# Supplementary material
Source: Royal Society of Chemistry journal article supplement (doi:10.1039/d5ta09974a)
Supplement: d5ta09974a1.pdf [file d5ta09974a1.pdf]

## Supplementary Information

# Photosensitization by $[\text{Mo}_3\text{S}_{13}]^{2-}$ nanocluster cocatalysts enabling visible-light photocatalytic $\text{H}_2$ evolution

Chao Yang,<sup>abc</sup> Xiao-Li Pu,<sup>abc</sup> Qi Yin,<sup>bc</sup> Qing-Ping Huang,<sup>bc</sup> Lei Cai,<sup>\*d</sup> Ping Liu<sup>a</sup> and Zhi-Bin

Fang<sup>\*abc</sup>

<sup>a</sup> College of Chemistry, Fuzhou University, Fuzhou 350108, P. R. China

<sup>b</sup> State Key Laboratory of Structural Chemistry, Fujian Institute of Research on the Structure of Matter, Chinese Academy of Sciences, Fuzhou, 350108, P. R. China

<sup>c</sup> Fujian College, University of Chinese Academy of Sciences, Fuzhou 350002, P. R. China.

<sup>d</sup> College of Chemistry and Chemical Engineering, Xinjiang Agricultural University, Urumqi 830052, P. R. China.

\*Corresponding authors: fangzhibin@fjirsm.ac.cn; lcai@xjau.edu.cn

## Characterizations

Crystal structure identification was performed using Bruker D8 Advance X-ray diffractometer (XRD) with Cu K $\alpha$  radiation ( $\lambda = 0.15418$  nm) operating at 40 kV and 40 mA. Scanning electron microscopy (SEM) images were obtained using a HITACHI SU8000 field-emission scanning electron microscope. Transmission electron microscopy (TEM) images were taken on a Tecnai G2 F20 S-TWIN (FEI company). UV-Vis diffuse reflectance spectroscopy (DRS) was measured by a Carry 500 UV-Vis spectrophotometer using BaSO<sub>4</sub> as the background. Zeta potential was measured by a Zetasizer Nano ZEN3690 (Malvern Instruments. Ltd) using a DTS1070 cuvette dispersed in solvents at 25°C. Raman spectroscopy was performed on a microscopic confocal laser Raman spectrometer (inVia Reflex, Renishaw Co.) using a  $\lambda = 532$  nm laser at room temperature. Bruker model A300 spectrometer (frequency: 9.86 GHz; central field: 3512.48 G) was used to detect the electron paramagnetic resonance (EPR) signals of samples. X-ray photoelectron spectroscopy (XPS) was conducted on ESCALAB 250Xi spectrometer (ThermoFisher Scientific Inc). XPS spectra were charge-corrected to the adventitious C 1s peak at 284.8 eV. In-situ XPS was conducted on Proven-X NAP spectrometer (SPECS Surface Nano Analysis GmbH) with additional light irradiation via Xe lamp. The vacuum heating treatments were conducted on ASAP-2020 gas sorption station (Micromeritics Co. Ltd). Ultrafast transient absorption (TA) spectroscopy was tested on samples dispersed in methanol by Helios spectrometer (Ultrafast Systems. Ltd) at a pumping wavelength of 400 nm.

## Electrochemical performance tests

The linear sweep voltammetry (LSV), electrochemical impedance spectroscopy (EIS) and photocurrent response were performed on an electrochemical workstation (CHI660E) with a three-electrode system. Ag/AgCl electrode and Pt electrode served as the reference electrode and counter electrode, respectively. Samples deposited in a 0.5×0.5 cm<sup>2</sup> window on ITO glasses served as working electrodes (loading 0.308 mg·cm<sup>-2</sup>) for EIS and photocurrent tests with 0.2 M Na<sub>2</sub>SO<sub>4</sub> aqueous solution as the electrolyte. LSV test was carried out in 0.5 M H<sub>2</sub>SO<sub>4</sub> electrolyte with scan rate of 10 mV·s<sup>-1</sup>, and samples were loaded on glassy carbon electrodes with 3 mm diameter as working electrodes (loading 0.424 mg·cm<sup>-2</sup>).

## Computational method

Two different models were constructed based on a 4×4×1 ZnS supercell. In the model of Figure

5a, a  $2 \times 2 \times 1$   $(\text{NH}_4)_2\text{Mo}_3\text{S}_{13}$  supercell was placed on the surface. In the model of Figure S14, a single  $\text{Mo}_3\text{S}_{13}$  cluster was placed on the ZnS surface. For both models, the initial adsorption site was chosen as the S-top site of  $\text{Mo}_3\text{S}_{13}$ . The Density Functional Theory (DFT) calculations were performed with Gaussian 16 program<sup>1</sup> and the input files were created by Multiwfn package<sup>2</sup>. The B3LYP hybrid functional<sup>3</sup> and def2-SVP basis set were adopted and the dispersion correction has been considered by using DFT-D3BJ method of Grimme<sup>4</sup> in optimization and single point energy calculations. The difference map for electron density is plotted by the Multiwfn package<sup>2</sup>. and visualized by VESTA software.

## Reference

1. M. J. Frisch, G. W. T., H. B. Schlegel, G. E. Scuseria, *et al.*, a. D. J. F., Gaussian, Inc., Wallingford CT, Gaussian 16. **2019**.
2. Lu, T.; Chen, F., Multiwfn: a multifunctional wavefunction analyzer. *J. Comput. Chem.* **2012**, *33*(5), 580-92.
3. Becke, A. D., Density-functional thermochemistry. III. The role of exact exchange. *J. Chem. Phys.* **1993**, *98* (7), 5648-5652.
4. S. Grimme, S. Ehrlich, L. Goerigk, Effect of the damping function in dispersion corrected density functional theory. *J. Comput. Chem.* **2011**, *32* (7), 1456-65.

## Results

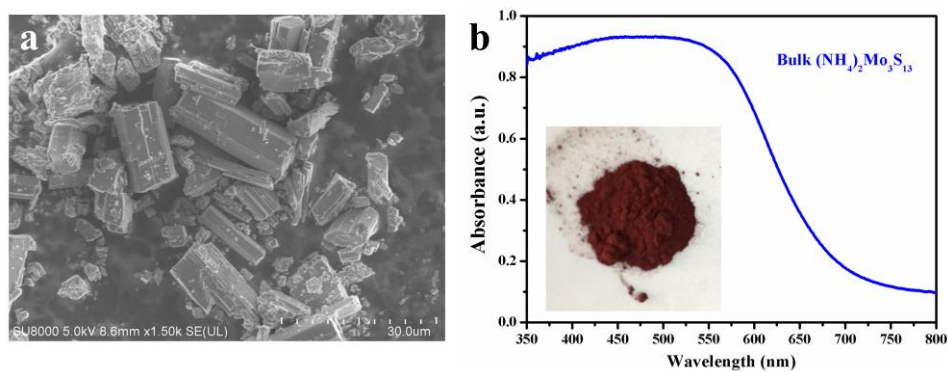

**Figure S1** (a) SEM images of as-prepared bulk  $(\text{NH}_4)_2\text{Mo}_3\text{S}_{13}$ , (b) DRS spectra.

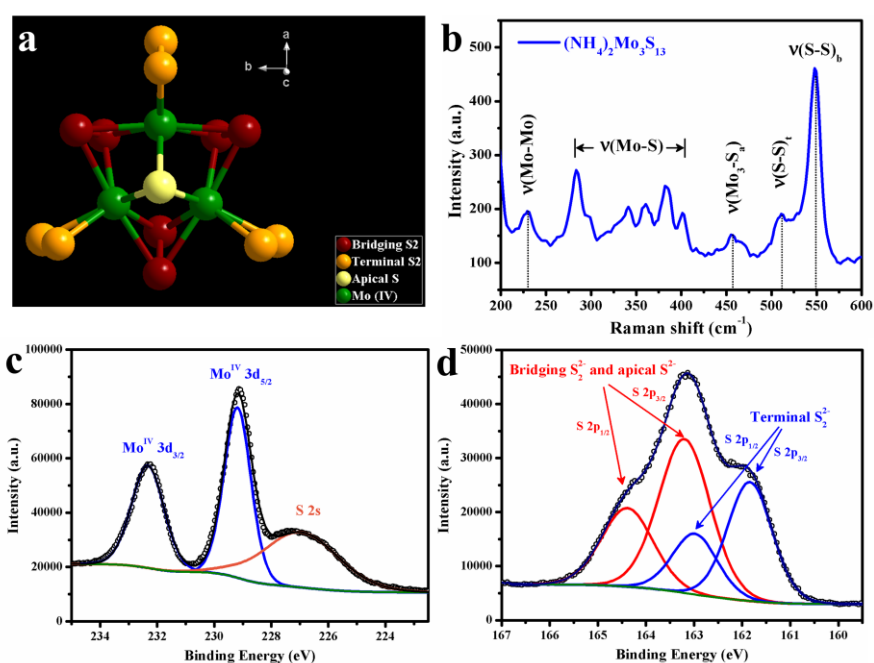

**Figure S2** (a) Model of a single  $[\text{Mo}_3\text{S}_{13}]^{2-}$  cluster; (b) Raman spectrum and (c)(d) XPS spectra of as-prepared  $(\text{NH}_4)_2\text{Mo}_3\text{S}_{13} \cdot n\text{H}_2\text{O}$ : (c) Mo 3d region; (d) S 2p region.

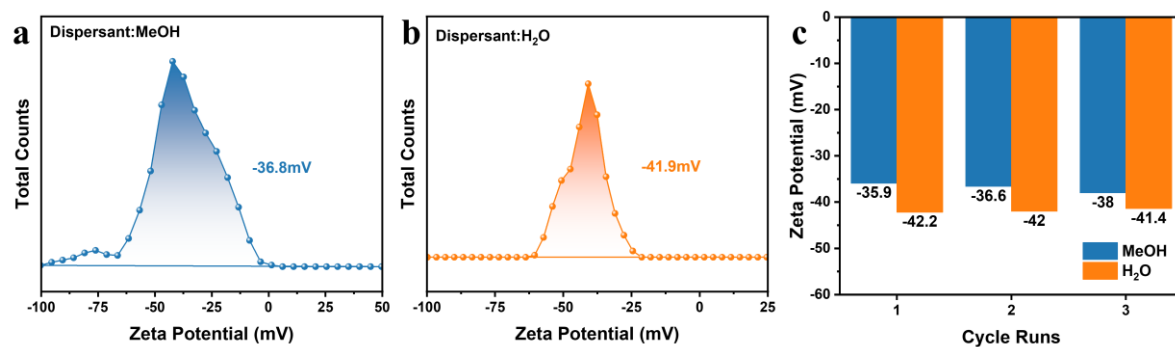

**Figure S3** Zeta potentials of  $[\text{Mo}_3\text{S}_{13}]^{2-}$  nanoclusters dispersed in (a) methanol, (b) water, and (c) the values in respective test cycles.

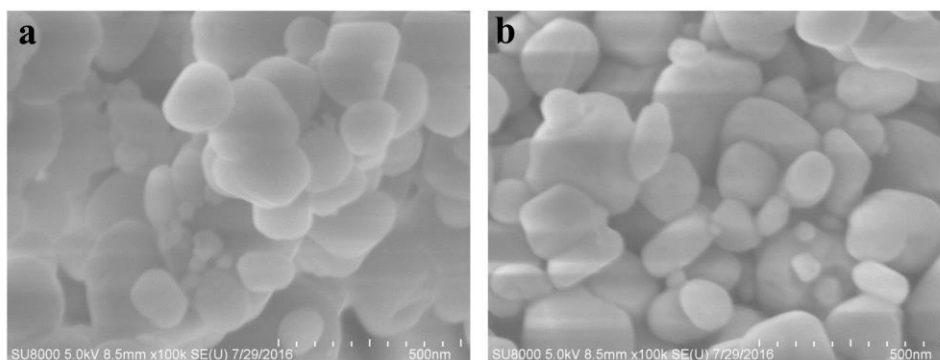

**Figure S4** SEM images of (a) C-ZS and (b) 1%M3-C-ZS.

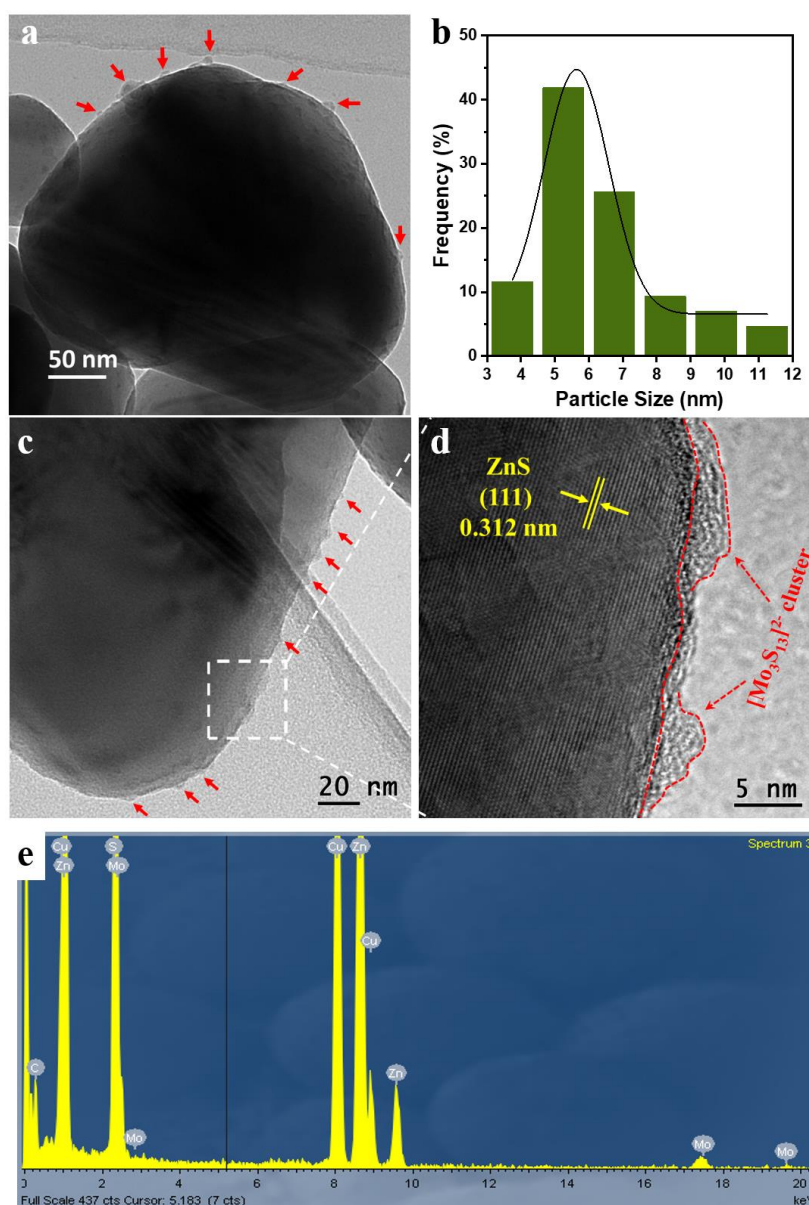

**Figure S5** (a)(c) TEM and (d) HRTEM images of 2%M3-C-ZS sample; (b) Size Distribution of supported  $[\text{Mo}_3\text{S}_{13}]^{2-}$  nanoclusters counted from Figures 2d, S5a and S5c; (e) Corresponding EDX spectrum of (a).

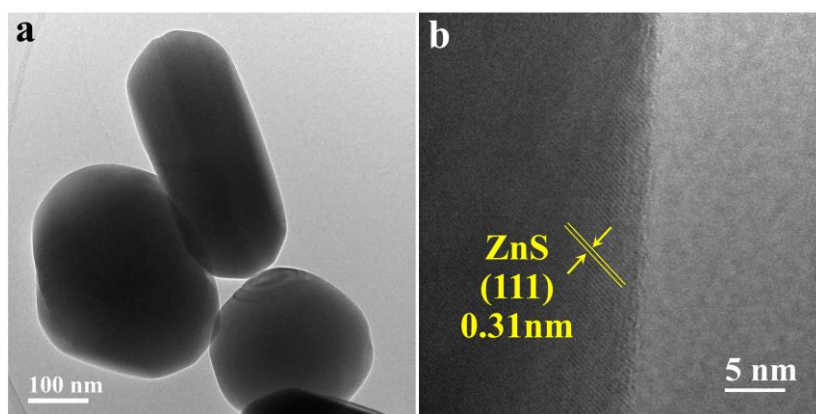

**Figure S6** (a) TEM image of C-ZS sample and (b) HRTEM image of the edge of C-ZS nanoparticle.

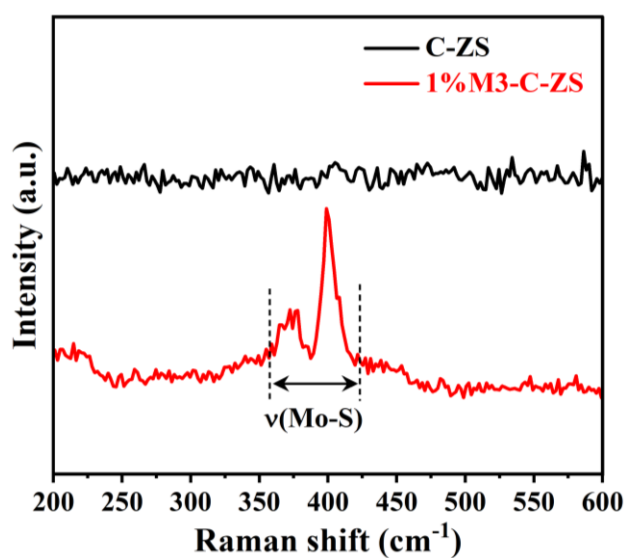

**Figure S7** Raman spectra of 1%M3-C-ZS and C-ZS.

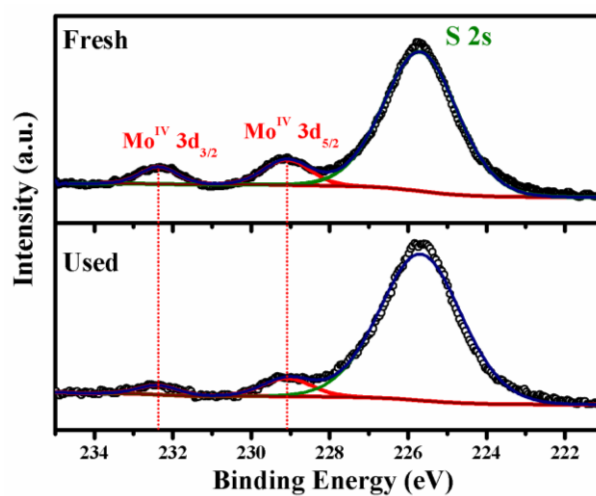

**Figure S8** XPS Mo 3d spectra for 1%M3-C-ZS before and after 6 cycle runs of visible-light photocatalysis.

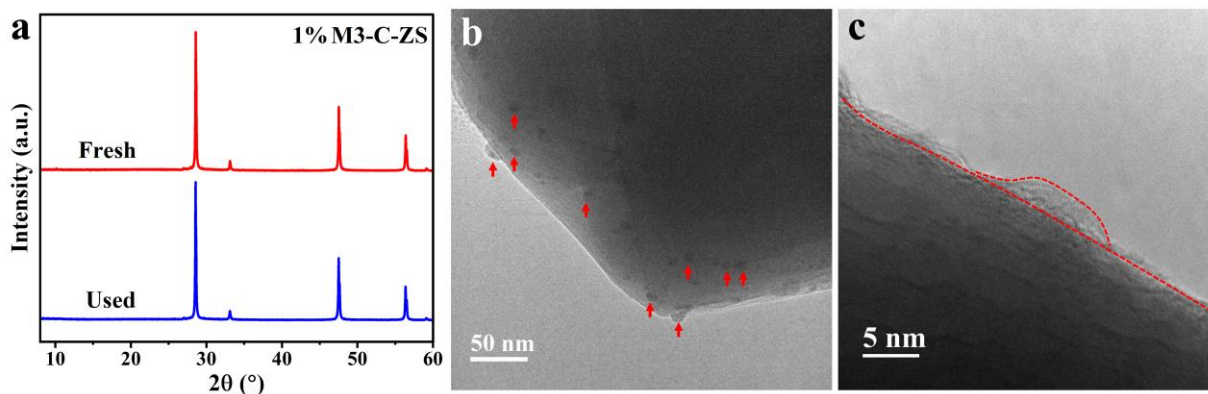

**Figure S9** Characterizations of 1%M3-C-ZS after 6 cycle runs of photocatalysis: (a) XRD comparison with fresh sample; (b)(c) TEM images of the used 1%M3-C-ZS.

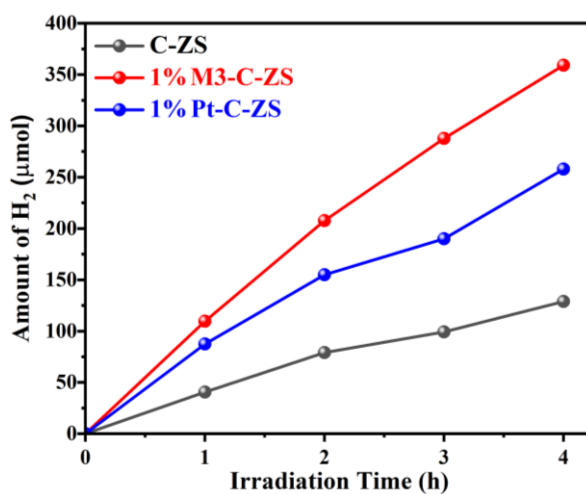

**Figure S10** UV-light ( $300 \text{ nm} < \lambda < 400 \text{ nm}$ ) photocatalytic HER activities of 1%M3-C-ZS (30 mg) compared with C-ZS, and 1%Pt-C-ZS (prepared via in-situ photodeposition of 1%wt Pt on ZnS)

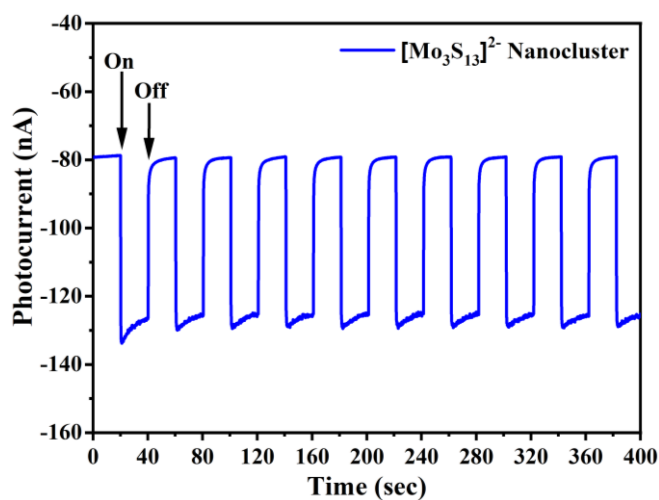

**Figure S11** Photocurrent response of sole [Mo<sub>3</sub>S<sub>13</sub>]<sup>2-</sup> nanoclusters under visible light irradiation ( $\lambda \geq 410 \text{ nm}$ , 0 V bias).

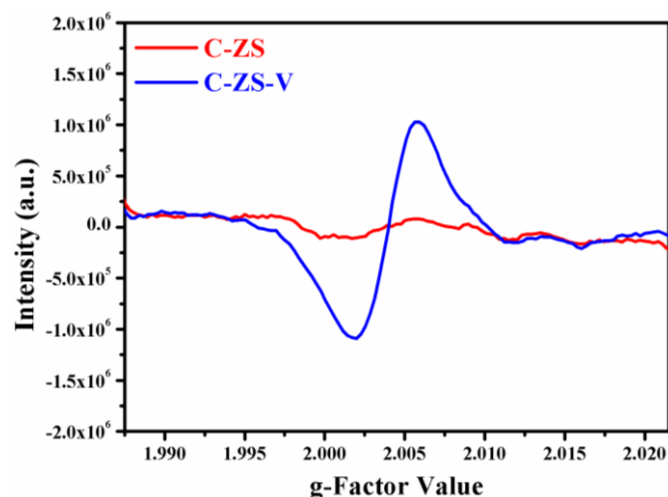

**Figure S12** Evidence of defects in ZnS: EPR spectra of C-ZS and C-ZS-V.

**Table S1** Data for the calculation of HER AQYs by 30 mg 1%M3-C-ZS photocatalyst.

| Wavelength (nm) | Irradiance <sup>a</sup> ( $\mu\text{W}\cdot\text{cm}^{-2}$ ) | H <sub>2</sub> yield ( $\mu\text{mol}/\text{h}/\text{g}_{\text{cat}}$ ) | Number of incident photons | Number of reacted electrons | AQY (%) |
|-----------------|--------------------------------------------------------------|-------------------------------------------------------------------------|----------------------------|-----------------------------|---------|
| 400             | 18747.8                                                      | 19.8                                                                    | $4.9\times 10^{22}$        | $2.4\times 10^{19}$         | 0.49    |
| 420             | 19674.9                                                      | 17.7                                                                    | $5.1\times 10^{22}$        | $2.1\times 10^{19}$         | 0.41    |
| 450             | 24129.5                                                      | 17.4                                                                    | $6.3\times 10^{22}$        | $2.1\times 10^{19}$         | 0.33    |
| 475             | 26401.4                                                      | 12.6                                                                    | $6.9\times 10^{22}$        | $1.5\times 10^{19}$         | 0.22    |
| 500             | 27598.1                                                      | 10.4                                                                    | $7.2\times 10^{22}$        | $1.2\times 10^{19}$         | 0.17    |

<sup>a</sup> The geometric irradiation area of incident lights was 18.08 cm<sup>2</sup>.

AQY is defined as the ratio of the number of reacted electrons (2 times of the produced H<sub>2</sub> molecules) to the number of incident photons. The general equation is given below:

$$\text{AQY (\%)} = \frac{\text{Number of reacted electrons}}{\text{Number of incident photons}} \times 100$$

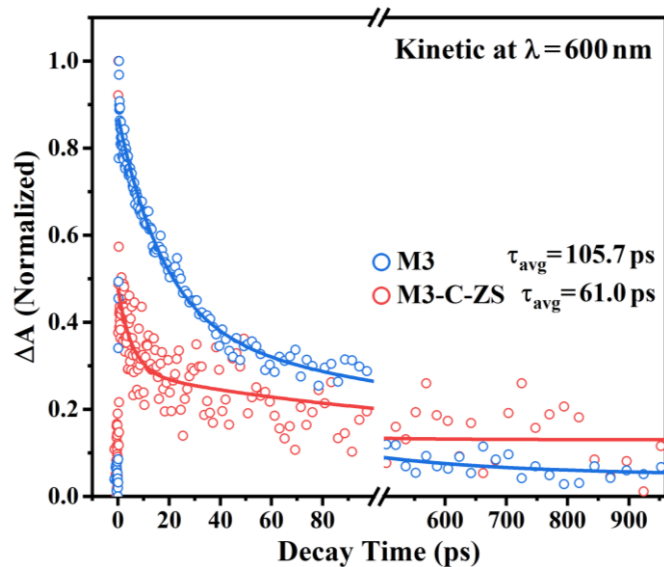

**Figure S13** TA kinetics of ESA signal probed at  $\lambda = 600$  nm.

**Table S2** Fitting parameters for the kinetic curves of TA spectra

| Sample                 | Recovery Time (ps) |          | Amplitude |        | Average $\tau$ (ps) |
|------------------------|--------------------|----------|-----------|--------|---------------------|
|                        | $\tau_1$           | $\tau_2$ | $A_1$     | $A_2$  |                     |
| M3<br>(at 490 nm)      | $\tau_1$           | 20.76    | $A_1$     | 0.4155 | 91.9                |
|                        | $\tau_2$           | 162.81   | $A_2$     | 0.4169 |                     |
| M3-C-ZS<br>(at 490 nm) | $\tau_1$           | 4.44     | $A_1$     | 0.1609 | 45.2                |
|                        | $\tau_2$           | 159.46   | $A_2$     | 0.0575 |                     |
| M3<br>(at 600 nm)      | $\tau_1$           | 18.51    | $A_1$     | 0.5025 | 105.7               |
|                        | $\tau_2$           | 241.47   | $A_2$     | 0.3229 |                     |
| M3-C-ZS<br>(at 600 nm) | $\tau_1$           | 5.41     | $A_1$     | 0.1922 | 61.0                |
|                        | $\tau_2$           | 129.56   | $A_2$     | 0.1558 |                     |

$$\tau_{avg} = \frac{\sum_{i=1}^n A_i \tau_i}{\sum_{i=1}^n A_i}$$

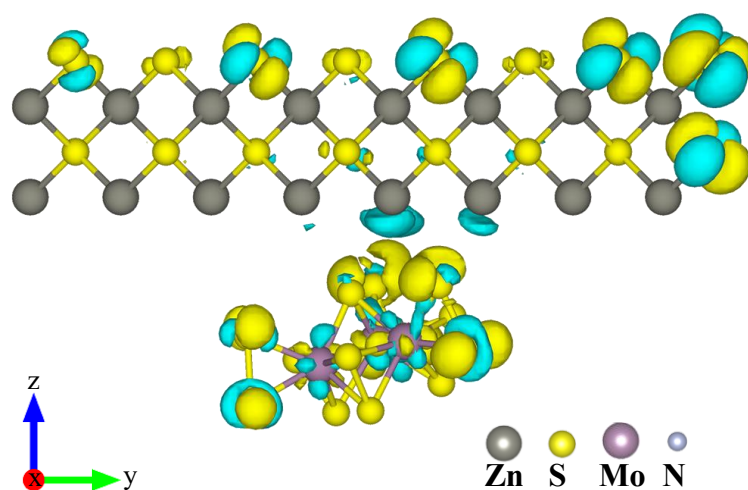

**Figure S14** Charge density difference at the interface between single  $[\text{Mo}_3\text{S}_{13}]^{2-}$  cluster and ZnS (cyan: electron gain; yellow: electron loss).
